# Supplementary material for: Towards personalised allele-specific CRISPR gene editing to treat autosomal dominant disorders
Source: PubMed Central journal article supplement (PMC5701044; doi:10.1038/s41598-017-16279-4), 2017-11-23

**Supplementary Table 2:** Oligo nucleotides used to clone the CRISPR/Cas9 constructs and luciferase reporter plasmids

| Oligo sequence (5' to 3')       | Oligo name        |
|---------------------------------|-------------------|
| CACCGACTCAGCTGTACACGGACTGCA     | sgR124C22ntTOP    |
| AAACTGCAGTCCGTGTACAGCTGAGTC     | sgR124C22ntBOTTOM |
| CACCGCTCAGCTGTACACGGACTGCA      | sgR124C21ntTOP    |
| AAACTGCAGTCCGTGTACAGCTGAGC      | sgR124C21ntBOTTOM |
| CACCGTCAGCTGTACACGGACTGCA       | sgR124C20ntTOP    |
| AAACTGCAGTCCGTGTACAGCTGAC       | sgR124C20ntBOTTOM |
| CACCGCAGCTGTACACGGACTGCA        | sgR124C19ntTOP    |
| AAACTGCAGTCCGTGTACAGCTGC        | sgR124C19ntBOTTOM |
| CACCGAGCTGTACACGGACTGCA         | sgR124C18ntTOP    |
| AAACTGCAGTCCGTGTACAGCTC         | sgR124C18ntBOTTOM |
| CACCGGCTGTACACGGACTGCA          | sgR124C17ntTOP    |
| AAACTGCAGTCCGTGTACAGCC          | sgR124C17ntBOTTOM |
| CACCGCTGTACACGGACTGCA           | sgR124C16ntTOP    |
| AAACTGCAGTCCGTGTACAGC           | sgR124C16ntBOTTOM |
| CACCG ACCACTCAGCTGTACACGGACCACA | sgR124H22ntTOP    |
| AAACTGTGGTCCGTGTACAGCTGAGTGTC   | sgR124H22ntBOTTOM |
| CACCG CCACTCAGCTGTACACGGACCACA  | sgR124H21ntTOP    |
| AAACTGTGGTCCGTGTACAGCTGAGTGCC   | sgR124H21ntBOTTOM |
| CACCG CACTCAGCTGTACACGGACCACA   | sgR124H20ntTOP    |
| AAACTGTGGTCCGTGTACAGCTGAGTGC    | sgR124H20ntBOTTOM |
| CACCG ACTCAGCTGTACACGGACCACA    | sgR124H19ntTOP    |
| AAACTGTGGTCCGTGTACAGCTGAGTC     | sgR124H19ntBOTTOM |
| CACCG CTCAGCTGTACACGGACCACA     | sgR124H18ntTOP    |
| AAACTGTGGTCCGTGTACAGCTGAGC      | sgR124H18ntBOTTOM |
| CACCG TCAGCTGTACACGGACCACA      | sgR124H17ntTOP    |
| AAACTGTGGTCCGTGTACAGCTGAC       | sgR124H17ntBOTTOM |
| CACCG CAGCTGTACACGGACCACA       | sgR124H16ntTOP    |
| AAACTGTGGTCCGTGTACAGCTGC        | sgR124H16ntBOTTOM |
| CACCG ACTCAGCTGTACACGGACCTCA    | sgR124L22ntTOP    |
| AAACTGAGGTCCGTGTACAGCTGAGTC     | sgR124L22ntBOTTOM |
| CACCG CTCAGCTGTACACGGACCTCA     | sgR124L21ntTOP    |
| AAACTGAGGTCCGTGTACAGCTGAGC      | sgR124L21ntBOTTOM |
| CACCG TCAGCTGTACACGGACCTCA      | sgR124L20ntTOP    |
| AAACTGAGGTCCGTGTACAGCTGAC       | sgR124L20ntBOTTOM |
| CACCG CAGCTGTACACGGACCTCA       | sgR124L19ntTOP    |
| AAACTGAGGTCCGTGTACAGCTGC        | sgR124L19ntBOTTOM |

|                                                             |                              |
|-------------------------------------------------------------|------------------------------|
| CACCG AGCTGTACACGGACCTCA                                    | sgR124L18ntTOP               |
| AAACTGAGGTCCGTGTACAGCTC                                     | sgR124L18ntBOTTOM            |
| CACCG GCTGTACACGGACCTCA                                     | sgR124L17ntTOP               |
| AAACTGAGGTCCGTGTACAGCC                                      | sgR124L17ntBOTTOM            |
| CACCG CTGTACACGGACCTCA                                      | sgR124L16ntTOP               |
| AAACTGAGGTCCGTGTACAGC                                       | sgR124L16ntBOTTOM            |
| CACCG CCAAGAGTCTGCTCCATTCTCT                                | sgR555W22ntTOP               |
| AAACAGAGAATGGAGCAGACTCTTGGC                                 | sgR555W22ntBOTTOM            |
| CACCG CAAGAGTCTGCTCCATTCTCT                                 | sgR555W21ntTOP               |
| AAACAGAGAATGGAGCAGACTCTTGC                                  | sgR555W21ntBOTTOM            |
| CACCG AAGAGTCTGCTCCATTCTCT                                  | sgR555W20ntTOP               |
| AAACAGAGAATGGAGCAGACTCTTC                                   | sgR555W20ntBOTTOM            |
| CACCG AGAGTCTGCTCCATTCTCT                                   | sgR555W19ntTOP               |
| AAACAGAGAATGGAGCAGACTCTC                                    | sgR555W19ntBOTTOM            |
| CACCG GAGTCTGCTCCATTCTCT                                    | sgR555W18ntTOP               |
| AAACAGAGAATGGAGCAGACTCC                                     | sgR555W18ntBOTTOM            |
| CACCG AGTCTGCTCCATTCTCT                                     | sgR555W17ntTOP               |
| AAACAGAGAATGGAGCAGACTC                                      | sgR555W17ntBOTTOM            |
| CACCG GTCTGCTCCATTCTCT                                      | sgR555W16ntTOP               |
| AAACAGAGAATGGAGCAGACC                                       | sgR555W16ntBOTTOM            |
| CACCG CCAAGAGTCTGCTCTGTTCTCT                                | sgR555Q22ntTOP               |
| AAACAGAGAACAGAGCAGACTCTTGGC                                 | sgR555Q22ntBOTTOM            |
| CACCG CAAGAGTCTGCTCTGTTCTCT                                 | sgR555Q21ntTOP               |
| AAACAGAGAACAGAGCAGACTCTTGC                                  | sgR555Q20ntBOTTOM            |
| CACCG AAGAGTCTGCTCTGTTCTCT                                  | sgR555Q20ntTOP               |
| AAACAGAGAACAGAGCAGACTCTTC                                   | sgR555Q21ntBOTTOM            |
| CACCG AGAGTCTGCTCTGTTCTCT                                   | sgR555Q19ntTOP               |
| AAACAGAGAACAGAGCAGACTCTC                                    | sgR555Q19ntBOTTOM            |
| CACCG GAGTCTGCTCTGTTCTCT                                    | sgR555Q19ntTOP               |
| AAACAGAGAACAGAGCAGACTCC                                     | sgR555Q19ntBOTTOM            |
| CACCG AGTCTGCTCTGTTCTCT                                     | sgR555Q17ntTOP               |
| AAACAGAGAACAGAGCAGACTC                                      | sgR555Q17ntBOTTOM            |
| CACCG GTCTGCTCTGTTCTCT                                      | sgR555Q16ntTOP               |
| AAACAGAGAACAGAGCAGACC                                       | sgR555Q16ntBOTTOM            |
| AGATGCGGAGAAGCTGAGGCCTGAG                                   | sgR124L AsCpf1 TOP           |
| AAAACCTCAGGCCTCAGCTTCTCCGC                                  | sgR124L AsCpf1 BOTTOM        |
| CACCGCCTCCGAGCCCTGCCACCAA                                   | sgR555W sg21 S.aureus TOP    |
| AAACTTGGTGGCAGGGCTCGGAAGGC                                  | sgR555W sg21 S.aureus BOTTOM |
| CACCGCCTCCGAGCCCTGCCACCAA                                   | sgR555W sg22 S.aureus TOP    |
| AAACTTGGTGGCAGGGCTCGGAAGGCC                                 | sgR555W sg22 S.aureus BOTTOM |
| ACCACCACTCAGCTGTACACGGACCGCACGGAGAAGCTGAGGCCTGAGATG         | R124 Rep WT Top              |
| CTAGCATCTCAGGCCTCAGCTTCTCCGTGCGGTCCGTGTACAGCTGAGTGGTGGTGTAC | R124 Rep WT Bottom           |
| ACCACCACTCAGCTGTACACGGACTGCACGGAGAAGCTGAGGCCTGAGATG         | R124C Rep Mutant Top         |
| CTAGCATCTCAGGCCTCAGCTTCTCCGTGAGGTCCGTGTACAGCTGAGTGGTGGTGTAC | R124C Rep Mutant Bottom      |
| ACCACCACTCAGCTGTACACGGACCACCGAGAAGCTGAGGCCTGAGATG           | R124H Rep Mutant Top         |

|                                                            |                         |
|------------------------------------------------------------|-------------------------|
| CTAGCATCTCAGGCCTCAGCTTCTCCGTGGTCCGTGTACAGCTGAGTGGTGGTGTAC  | R124H Rep Mutant Bottom |
| ACCACCACTCAGCTGTACACGGACCTCACGGAGAAGCTGAGGCCTGAGATG        | R124L Rep Mutant Top    |
| CTAGCATCTCAGGCCTCAGCTTCTCCGTGAGGTCGTGTACAGCTGAGTGGTGGTGTAC | R124L Rep Mutant Bottom |
| TTCCGAGCCCTGCCACCAAGAGAACGGAGCAGACTCTGGGAGATGCCAAG         | R555 Rep WT Top         |
| CTAGCTTGGCATCTCCAAGAGTCTGCTCCGTTCTTGGTGGCAGGGCTCGGAAGTAC   | R555 Rep WT Bottom      |
| TTCCGAGCCCTGCCACCAAGAGAACAGAGCAGACTCTGGGAGATGCCAAG         | R555Q Rep Mutant Top    |
| CTAGCTTGGCATCTCCAAGAGTCTGCTCTGTTCTTGGTGGCAGGGCTCGGAAGTAC   | R555Q Rep Mutant Bottom |
| CTTCCGAGCCCTGCCACCAAGAGAATGGAGCAGACTCTGGGAGATGCCAA         | R555W MUT REP TOP       |
| CTAGTTGGCATCTCCAAGAGTCTGCTCCATTCTTGGTGGCAGGGCTCGGAAGGTAC   | R555W MUT REP BOTTOM    |

**Supplementary Table 3:** Off-target scores for each guide RNA utilised

|                                     |               | Benchling                                   |                 | MIT Optimised CRISPR Design Tool                    |
|-------------------------------------|---------------|---------------------------------------------|-----------------|-----------------------------------------------------|
|                                     |               | Off-target score                            | On-target score | Off-target score                                    |
| <i>S. pyogenes</i><br>Cas9 NGG PAM  | <b>R124WT</b> | 95                                          | 83.7            | 94.4                                                |
|                                     | <b>R124C</b>  | 62                                          | 65.4            | 80.1                                                |
|                                     | <b>R124H</b>  | 70                                          | 81.4            | 79.5                                                |
|                                     | <b>R124L</b>  | 71                                          | 47.9            | 82                                                  |
|                                     | <b>R555WT</b> | 65.6                                        | 48.1            | 83                                                  |
|                                     | <b>R555Q</b>  | 46.6                                        | 0.9             | 31                                                  |
|                                     | <b>R555W</b>  | 56.7                                        | 3.7             | 50                                                  |
| <i>S. aureus</i> Cas9<br>NNGRRT PAM | <b>R555W</b>  | 30.4                                        | 79.1            | Program does not look for <i>S. aureus</i> Cas9 PAM |
| <b>Mutant AsCpf1</b>                | <b>R124L</b>  | Program does not look for mutant AsCpf1 PAM |                 |                                                     |

**Supplementary Figure 1:** Allele-specific cleavage of L527R TGFBI mutation utilising a PAM-specific approach

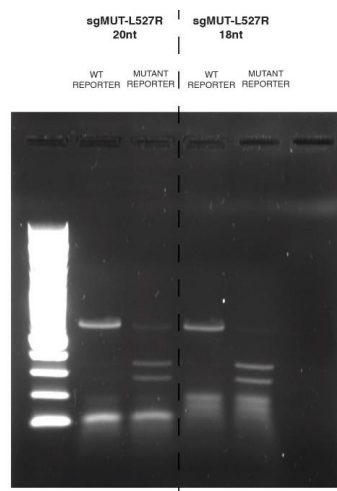

**Supplementary Figure 2:** Confirmation of the specificity achieved using a guide-specific system targeted to prevalent TGFBI mutations

R124C:

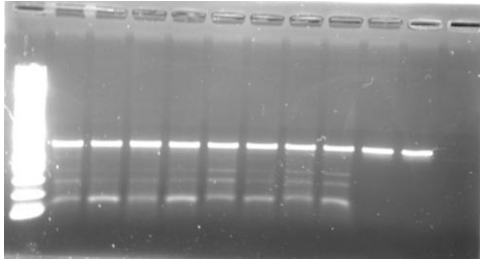

R124H:

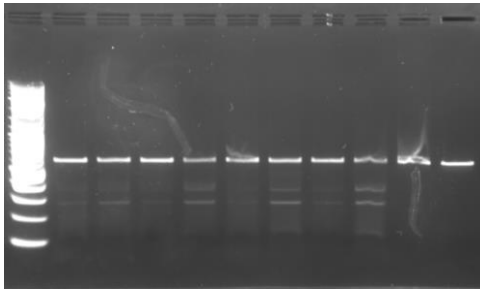

R124L:

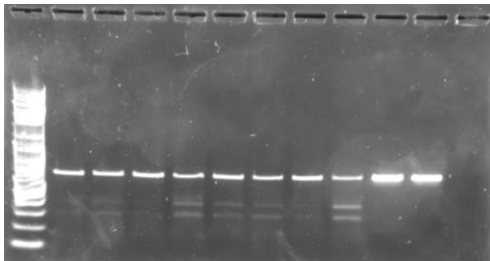

R555Q:

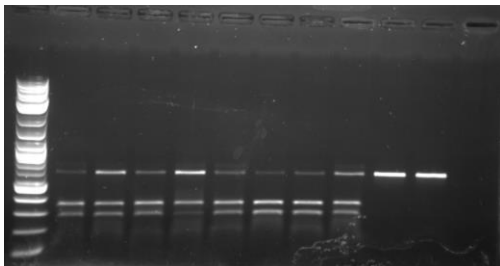

R555W:

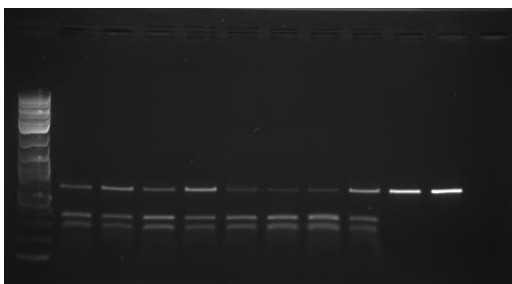

Supplement: 41598_2017_16279_MOESM1_ESM.pdf [file 41598_2017_16279_MOESM1_ESM.pdf]
